# Supplementary material for: G9a inhibits MEF2C activity to control sarcomere assembly
Source: PubMed Central journal article supplement (PMC5036183; doi:10.1038/srep34163), 2016-09-26
Supplement: srep34163-s1.pdf [file srep34163-s1.pdf]

## **G9a inhibits MEF2C activity to control sarcomere assembly**

Jin Rong Ow, Monica Palanichamy Kala, Vinay Kumar Rao, Min Hee Choi,  
Narendra Bharathy and Reshma Taneja

### **SUPPLEMENTARY INFORMATION**

**Supplementary Figure S1**

**Supplementary Figure S2**

**Supplementary Figure Legends**

**a**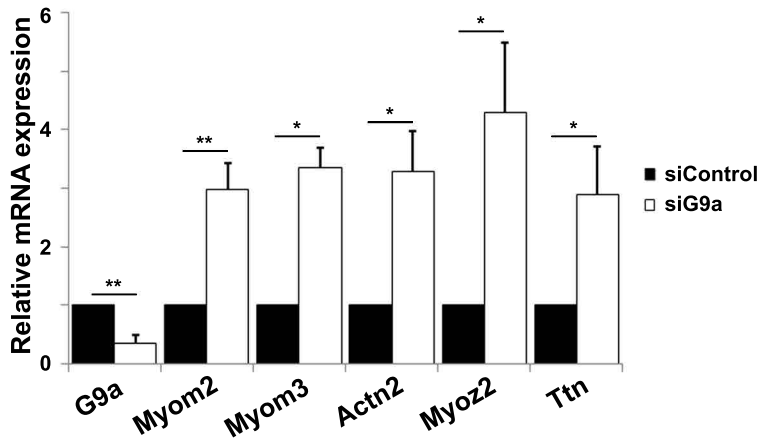**b**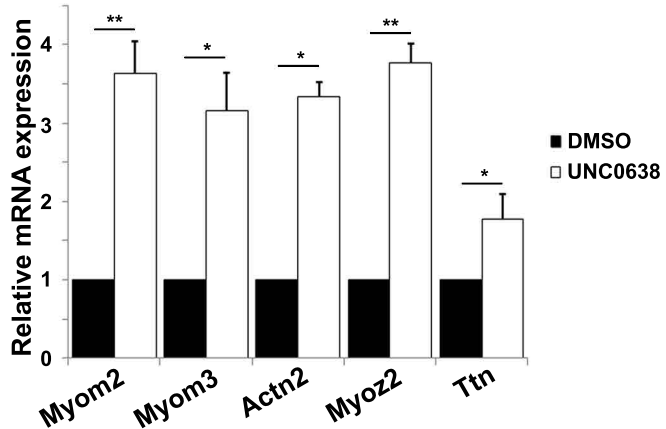

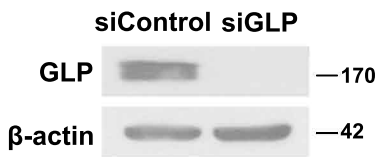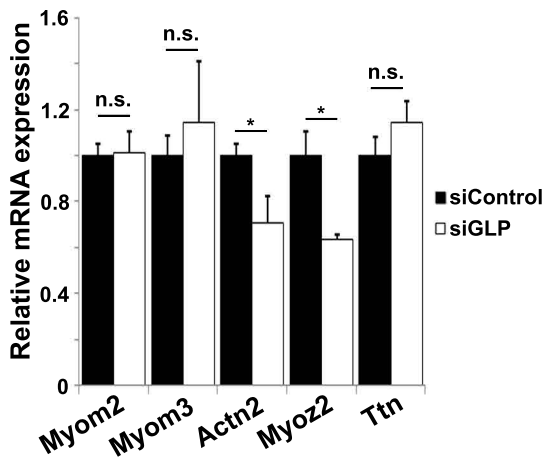

## Supplementary Figure Legends

**Supplementary Figure 1.** G9a represses sarcomeric genes in primary myoblasts in a methyltransferase-dependent manner. **(a)** Primary mouse myoblasts transfected with scrambled siRNA (siControl) or G9a-specific siRNA (siG9a) lysates were analyzed for expression of G9a, Myom2, Myom3, Actn2, Myoz2 and Ttn by qPCR. Error bars indicate mean  $\pm$ standard error. **(b)** Primary mouse myoblasts were treated with DMSO or UNC0638 for 48 hr in growth medium. Expression of sarcomeric genes in the absence and presence of UNC0638 treatment was examined by qPCR. Error bars indicate mean  $\pm$ standard deviation; results are representative of two independent experiments. \*  $p$ -value < 0.05; \*\*  $p$ -value < 0.01

**Supplementary Figure 2.** GLP does not regulate sarcomeric genes in myoblasts. C2C12 myoblasts transfected with scrambled siRNA (siControl) or GLP-specific siRNA (siGLP) were analyzed for GLP expression by western blot.  $\beta$ -actin was analyzed as a loading control. The mRNA expression of Myom2, Myom3, Actn2, Myoz2 and Ttn was analyzed by qPCR. Error bars indicate mean  $\pm$ standard deviation; results are representative of two independent experiments. n.s. indicates no significance; \*  $p$ -value < 0.05
